# Supplementary material
Source: PubMed Central journal article supplement (PMC6086726)
Supplement: NIHMS974298-supplement-1.pdf [file NIHMS974298-supplement-1.pdf]

**Table S1. Genotypes of DMS3m<sub>acr</sub> phages, Related to STAR Methods**

| <b>Phage</b>                                               | <b>acr gene source</b>                                | <b>Acr Accession</b> |
|------------------------------------------------------------|-------------------------------------------------------|----------------------|
| DMS3m <sub>acrIE3</sub><br>(parent phage, no manipulation) | Phage DMS3m (gp30)                                    | WP_003723290.1       |
| DMS3m <sub>acrIF1</sub>                                    | Phage JBD30 (gp35)                                    | YP_007392342.1       |
| DMS3m <sub>acrIF2</sub>                                    | Phage MP29 (gp29)                                     | YP_002332454.1       |
| DMS3m <sub>acrIF3</sub>                                    | Phage JBD88a (gp33)                                   | YP_007392440.1       |
| DMS3m <sub>acrIF4</sub>                                    | Phage JBD26 (gp37)                                    | WP_016068584.1       |
| DMS3m <sub>acrIF5</sub>                                    | Phage JBD5 (gp36)                                     | YP_007392740.1       |
| DMS3m <sub>acrIF6</sub>                                    | <i>Pseudomonas aeruginosa</i> strain PSE05 (prophage) | WP_043884810.1       |
| DMS3m <sub>acrIF7</sub>                                    | LPB1 (gp29)                                           | YP_009146150.1       |
| DMS3m <sub>acrIIA4</sub>                                   | <i>Listeria monocytogenes</i> J0161 (prophage)        | WP_003723290.1       |

**Table S2. Plasmids used in this study, Related to STAR Methods**

| <b>Plasmid</b>  | <b>Backbone</b>         | <b>Purpose</b>                                       |
|-----------------|-------------------------|------------------------------------------------------|
| pAB02           | pHERD30T                | crRNA overexpression:<br>CRISPR2 spacer 17           |
| pAB03           | pHERD30T                | crRNA overexpression:<br>CRISPR2 spacer 20           |
| pAB58           | pHERD30T                | Generating DMS3m <sub>acrIF2</sub>                   |
| pAB59           | pHERD30T                | Generating DMS3m <sub>acrIF3</sub>                   |
| pAB21           | pHERD20T                | Generating DMS3m <sub>acrIF4</sub>                   |
| pJZ69           | pHERD30T                | Generating DMS3m <sub>acrIF5</sub>                   |
| pJZ70           | pHERD30T                | Generating DMS3m <sub>acrIF6</sub>                   |
| pAB24           | pHERD20T                | Generating DMS3m <sub>acrIF7</sub>                   |
| pJZ69           | pHERD30T                | Generating DMS3m <sub>acrIIA4</sub>                  |
| pAB45           | pHERD20T                | Generating DMS3m <sub>acr</sub><br><i>gp52::gent</i> |
| pAB77,78        | pHERD20T and<br>30T     | C repressor (JBD30)<br>overexpression                |
| pAB79,80        | pHERD20T and<br>30T     | C repressor (DMS3)<br>overexpression                 |
| pBAO72          | pMMB67HE                | sgRNA targeting<br>DMS3m                             |
| pBAO95          | pUC18T-mini-Tn7T-<br>Gm | Insertion of SpyCas9 into<br>the PAO1 tn7 site       |
| pCsy_complex    | 2D                      | Csy complex expression<br>and purification           |
| pCRISPR_DMS3g24 | pMK                     | crRNA expression and<br>Csy complex purification     |
| pAcrIF4         | p15TV-L                 | AcrIF4 expression and<br>purification                |
